# Supplementary material for: Toward a telepresence robot empowered smart lab
Source: Springer Nature journal article supplement (doi:10.1186/s40561-019-0084-3), 2019-05-28
Supplement: MOESM1 [file 16757610]

Additional file 1 **– The Research Survey Questionnaires**

***Question 1***

Please enter your ping test result

***Question 2***

How old are you? (select one):

(18 to 29) (30 to 39) (40 to 49) (50 to 59) (More than 70)

***Question 3***

What is your gender? (select one):

Feminine Masculine Prefer not to disclose

***Question 4***

How competent do you feel about driving the robot within the remote lab? (select one):

Not at all competent 1 2 3 4 5 Very competent

Comment:

***Question 5***

The system had the functionalities I expected it to have? (select one):

Not at all 1 2 3 4 5 Very much

Comment:

***Question 6***

How easy it is to navigate the robot within the remote lab? (select one):

Very difficult 1 2 3 4 5 Very easy

Comment:

***Question 7***

Were you aware of your surrounding when driving the robot? (select one):

Not aware 1 2 3 4 5 Very aware

Comment:

***Question 8***

Was the robot easily driven within the remote lab? (select one):

Very difficult 1 2 3 4 5 Very easy

Comment:

***Question 9***

Do you think that the telepresence robot could improve your learning? (select one):

Not at all 1 2 3 4 5 Very much

Comment:

***Question 10***

Please tell us if you feel like you were actually in the lab? (select one):

Not at all 1 2 3 4 5 Very much

Comment:

***Question 11***

Please rate the pilot interface (select one):

Not good 1 2 3 4 5 Very good

Comment:

***Question 12***

Please rate the video quality (select one):

Not good 1 2 3 4 5 Very good

Comment:

***Question 13***

Did you feel involve with the learning materials when using the telepresence robot? (select one):

Not at all 1 2 3 4 5 Very much

Comment:

***Question 14***

How easy is to grab objects with the arm? (select one):

Very difficult 1 2 3 4 5 Very easy

Comment:

***Question 15***

Please rate your internet speed connection to the robot (select one):

Not good 1 2 3 4 5 Very good

Comment:

***Question 16***

Do you think that the robot should move more autonomously? (select one) :

Not at all 1 2 3 4 5 Very much

Comment:

***Question 17***

Did you find the pilot interface easy to understand? (select one):

Very difficult to understand 1 2 3 4 5 Very easy to understand

Comment:

***Question 18***

Would you consider taking lab works or courses via a telepresence robot? (select one):

Not at all 1 2 3 4 5 Very much

Comment:

***Question 19***

Do you play video games? (select one):

Not at all 1 2 3 4 5 Very much

Comment:

***Question 20***

Have you driven a telepresence robot before? (select one):

No Yes

Comment:

***Question 21***

Please rate your overall experience while driving the robot (select one):

Very bad 1 2 3 4 5 Very good

Comment:
